# Supplementary material for: Comparative transcriptome profiling of multi-ovary wheat under heterogeneous cytoplasm suppression
Source: PubMed Central journal article supplement (PMC6549160; doi:10.1038/s41598-019-43277-5), 2019-06-05
Supplement: 41598_2019_43277_MOESM1_ESM.pdf [file 41598_2019_43277_MOESM1_ESM.pdf]

## Supplementary Information

### Comparative transcriptome profiling of multi-ovary wheat under heterogeneous cytoplasm suppression

Jialin Guo<sup>1,2,3,4,5</sup>, Gaisheng Zhang<sup>1,2,3,4,5\*</sup>, Yulong Song<sup>1,2,3,4,5</sup>, Shoucai Ma<sup>1,2,3,4,5</sup>, Na Niu<sup>1,2,3,4,5</sup>, Junwei Wang<sup>1,2,3,4,5</sup>

<sup>1</sup>College of Agronomy, Northwest A & F University, Yangling, Shaanxi, 712100, P.R. China.

<sup>2</sup>National Yangling Agricultural Biotechnology & Breeding Center, Yangling, Shaanxi, 712100, P.R. China.

<sup>3</sup>Yangling Branch of State Wheat Improvement Centre, Yangling, Shaanxi, 712100, P.R. China.

<sup>4</sup>Wheat Breeding Engineering Research Center, Ministry of Education, Yangling, Shaanxi, 712100, P.R. China.

<sup>5</sup>Key Laboratory of Crop Heterosis of Shaanxi Province, Yangling, Shaanxi, 712100, P.R. China.

\*Corresponding author: Gaisheng Zhang

College of Agronomy, Northwest A & F University,  
Yangling, Shaanxi, 712100, P.R. China.

E-mail: zhanggsh58@aliyun.com

Tel: +86-29-87092085

Fax: +86-29-87092085



b

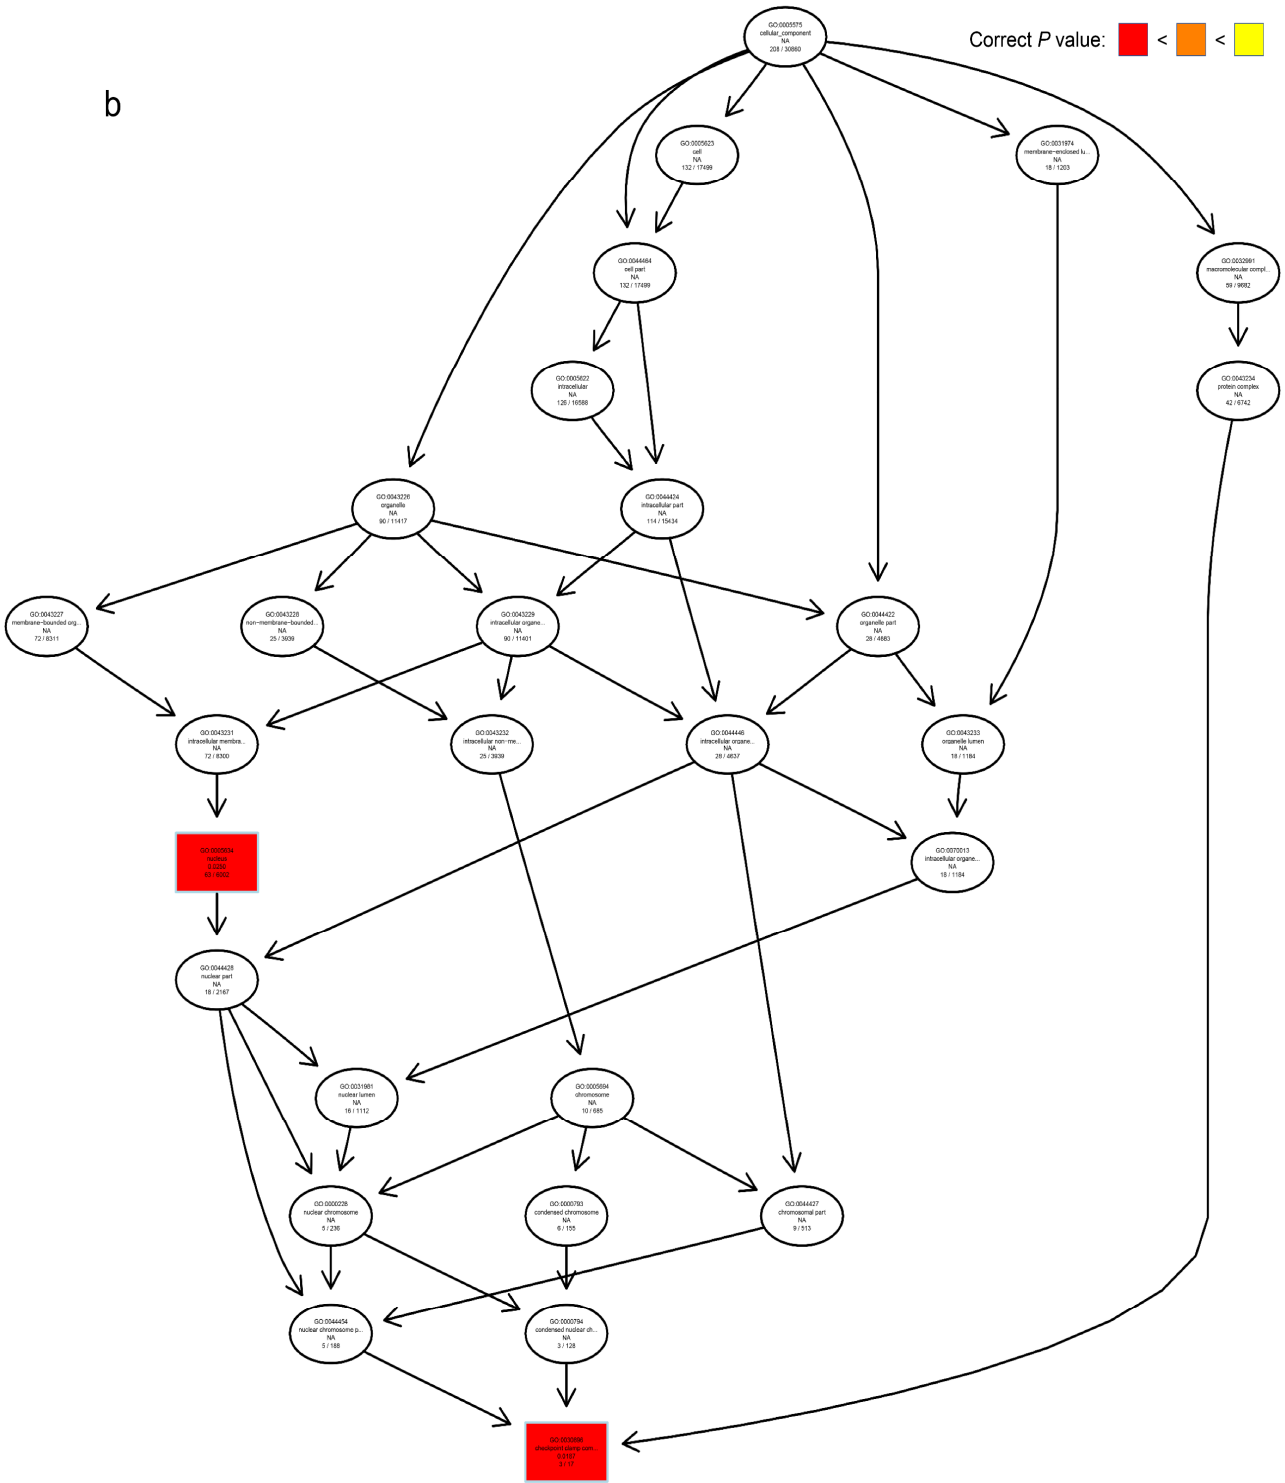

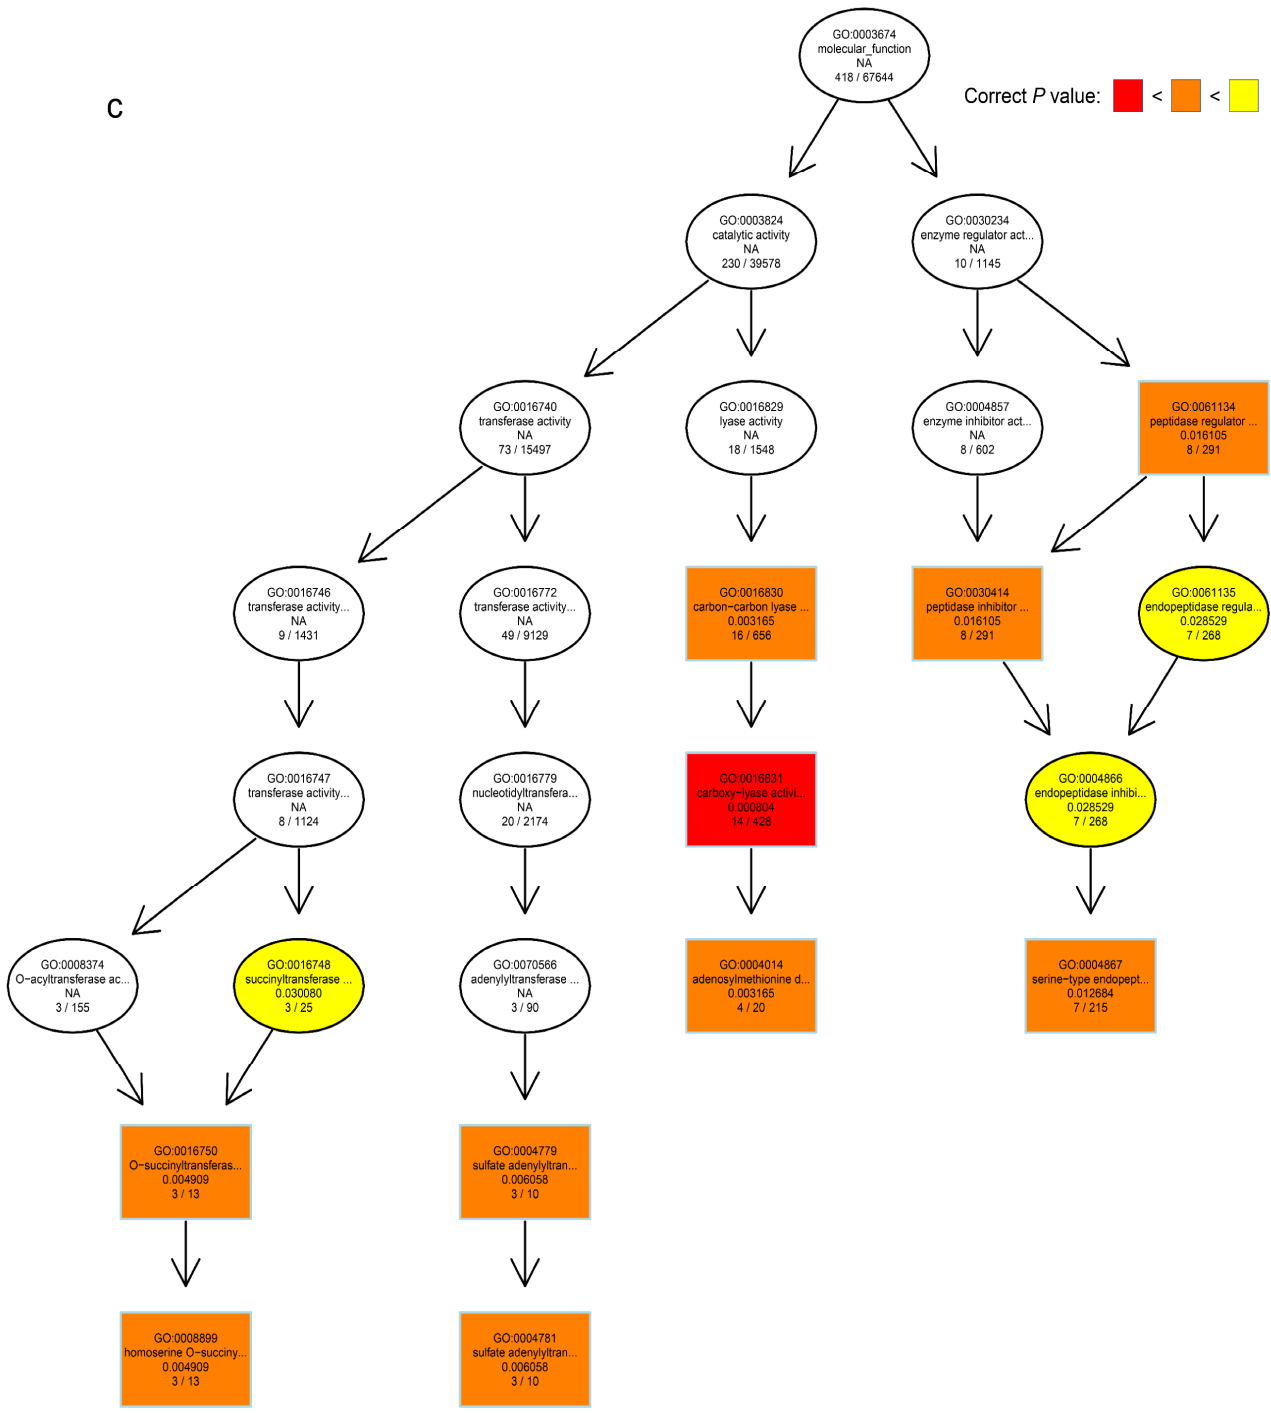

Supplementary Figure S1. Directed acyclic graphs of enriched GO terms. a, b and c represent directed acyclic graphs of enriched GO terms in biological process, cellular component and molecular function, respectively. The colored terms are significantly enriched GO terms. The darker the color, the smaller the corrected *P* value.

Supplementary Figure S2. Comparison of the  $\log_2$  fold change of 14 selected DEGs using RNA-seq and qRT-PCR.

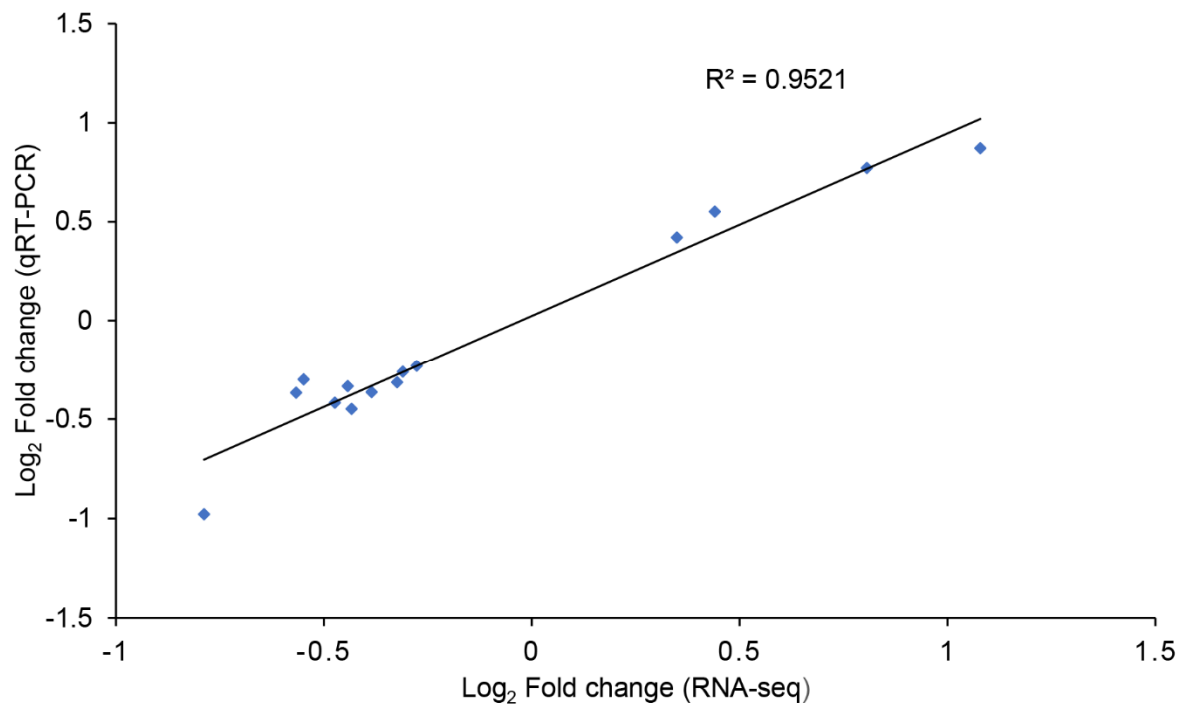

Supplementary Figure S2. Comparison of the  $\log_2$  fold change of 14 selected DEGs using RNA-seq and qRT-PCR.  $\log_2$  fold change,  $\log_2(\text{Mo\_HC}/\text{Mu\_NC})$ , and  $\text{Mu\_NC}$ ,  $F_1$  population derived from a cross between DUOII as female parent and TZI as male parent;  $\text{Mo\_HC}$ ,  $F_1$  population derived from a cross between TZI as female parent and DUOII as male parent.

Supplementary Table S1. Evaluation Statistics of transcriptome sequencing data

|                       | Mu_NC1               | Mu_NC2               | Mu_NC3               | Mo_HC1               | Mo_HC2               | Mo_HC3               |
|-----------------------|----------------------|----------------------|----------------------|----------------------|----------------------|----------------------|
| Raw Reads             | 89155990             | 121248314            | 97911120             | 116826696            | 114348164            | 111194976            |
| Clean Reads           | 86600650             | 117629072            | 94171412             | 113291774            | 110660532            | 107919556            |
| Clean Bases           | 12.99G               | 17.64G               | 14.13G               | 16.99G               | 16.60G               | 16.19G               |
| Q30 (%)               | 86.61                | 89.63                | 89.88                | 89.91                | 89.37                | 89.24                |
| GC (%)                | 54.86                | 54.96                | 55.27                | 55.06                | 55.43                | 54.4                 |
| Total Mapped Reads    | 61145956<br>(70.61%) | 84826134<br>(72.11%) | 66304722<br>(70.41%) | 80667958<br>(71.20%) | 78182672<br>(70.65%) | 78207164<br>(72.47%) |
| Multiple Mapped Reads | 6867312<br>(11.23%)  | 9564989<br>(11.28%)  | 7682207<br>(11.59%)  | 9301017<br>(11.53%)  | 8792795<br>(11.25%)  | 8626730<br>(11.03%)  |
| Uniquely Mapped Reads | 54278644<br>(88.77%) | 75261145<br>(88.72%) | 58622515<br>(88.41%) | 71366941<br>(88.47%) | 69389877<br>(88.75%) | 69580434<br>(88.97%) |

Note: Mu\_NC, F<sub>1</sub> population derived from a cross between DUOII as female parent and TZI as male parent; Mo\_HC, F<sub>1</sub> population derived from a cross between TZI as female parent and DUOII as male parent.

Supplementary Table S2. Primers used for qRT-PCR

| Primer name                    | Sequence (5' to 3')     | Annotation                             |
|--------------------------------|-------------------------|----------------------------------------|
| Actin-Forward                  | CTCCCTCACAACAACCGC      | Actin                                  |
| Actin-Reverse                  | TACCAGGAACTCCATACCAAC   |                                        |
| Traes_1AS_D0A2B50BE-Forward    | AGAGGTTTGTGATGGAGCAC    | MCM6-like                              |
| Traes_1AS_D0A2B50BE-Reverse    | TCTCAACCTTTTCAGCATCGG   |                                        |
| Traes_1BS_ADCD5C43B-Forward    | TCCCATAACAATCCATAACAGCG | Ethylene receptor                      |
| Traes_1BS_ADCD5C43B-Reverse    | CTGCTTGTGTCTGCCTTTATTG  |                                        |
| Traes_1DL_48CC7D8E0-Forward    | GGGCTGAACTTTTGTATGTGAG  | Trehalose-6-phosphate synthase         |
| Traes_1DL_48CC7D8E0-Reverse    | GAAACCCAATATGAGCAAACGG  |                                        |
| Traes_1DL_8809CD0A8-Forward    | AAACTTCCCTGATTCCCTG     | Ferredoxin--nitrite reductase          |
| Traes_1DL_8809CD0A8-Reverse    | CTCCCTGCACTATCTGAAAC    |                                        |
| Traes_2AL_05ECC440C-Forward    | GTCTCAAGTTCTGTCTCTGCC   | Auxin response factor                  |
| Traes_2AL_05ECC440C-Reverse    | ACCTTTGTATATGTCCGCACC   |                                        |
| Traes_2AL_A26170C43-Forward    | TGTGGCTGGATTAAACTGGG    | OsRR6 type-A response regulator        |
| Traes_2AL_A26170C43-Reverse    | TGACATTCCACGAGACAAGAC   |                                        |
| Traes_2DL_5B051BFD9-Forward    | AGATGGAGAACTGGTAAGCG    | DNA polymerase alpha complex subunit   |
| Traes_2DL_5B051BFD9-Reverse    | GCAGTATACAAGACGGAGCAC   |                                        |
| Traes_2DL_CB0208DE0-Forward    | TGTCACTTACCTTTGCTCTGAG  | PCNA                                   |
| Traes_2DL_CB0208DE0-Reverse    | AGCCCATCTCACCAATCTTG    |                                        |
| Traes_4DL_C083C804E-Forward    | TCCCTTCTAGCTCTCCAAG     | Ethylene-insensitive 3                 |
| Traes_4DL_C083C804E-Reverse    | CCACTCAAGCAACTCTCCC     |                                        |
| Traes_5DS_76A4D5D4E-Forward    | CATTGCAGCTCTCAAACAG     | Auxin-responsive Aux/IAA factor        |
| Traes_5DS_76A4D5D4E-Reverse    | GTTTGCTTCGCTCCTTTCTG    |                                        |
| Traes_7BL_9ED99FB9E1-Forward   | CGTGTCTGGTCTCATCTGTTC   | EIN3-binding F-box protein 1-like      |
| Traes_7BL_9ED99FB9E1-Reverse   | GAGTGAGGGTGAGGTTTGTG    |                                        |
| Traes_7DS_E5A18AAA4-Forward    | AAGTCCGACGTGTTCCAC      | Transcription factor HBP-1b(c1)-like   |
| Traes_7DS_E5A18AAA4-Reverse    | ATATCAAGGTCGCTCAAGGTG   |                                        |
| TRAES3BF054800030CFD_g-Forward | CCGGCAAGATCTCCTTTACAG   | DNA polymerase epsilon complex subunit |
| TRAES3BF054800030CFD_g-Reverse | AGAGGCAATGGACACAGATG    |                                        |
| TRAES3BF082400010CFD_g-Forward | ATCCATCTTTCCACCCTTCAC   | NADP-dependent malic enzyme 1          |
| TRAES3BF082400010CFD_g-Reverse | GCTCTCCGCATATTTCTCCAG   |                                        |
